# Supplementary material
Source: PubMed Central journal article supplement (PMC4192020)
Supplement: NIHMS590129-supplement-Supp_Figure___Tables.pdf [file NIHMS590129-supplement-Supp_Figure___Tables.pdf]

Supplemental Table 1: Patients and histopathology of the resected colorectal carcinomas which underwent microdessection and proteome analysis

|                                  |     | Stage UICC II | Stage UICC III |
|----------------------------------|-----|---------------|----------------|
| <b>Number</b>                    |     | 9             | 10             |
| <b>Gender</b>                    | m/f | 5/4           | 5/5            |
| <b>Age (range)</b>               |     | 74 (60-83)    | 70 (58-84)     |
| <b>Local tumor invasion</b>      |     |               |                |
| <b>pT</b>                        | 1   | 0             | 1              |
|                                  | 2   | 0             | 3              |
|                                  | 3 a | 3             | 1              |
|                                  | 3 b | 3             | 3              |
|                                  | 3 c | 2             | 0              |
|                                  | 3 d | 0             | 0              |
|                                  | 4 a | 0             | 0              |
|                                  | 4 b | 0             | 1              |
|                                  | 4 c | 1             | 1              |
| <b>Nodal status</b>              |     |               |                |
| <b>pN</b>                        | 0   | 9             | 0              |
|                                  | 1   | 0             | 6              |
|                                  | 2   | 0             | 4              |
| <b>Lymphatic vessel invasion</b> |     |               |                |
| <b>pL</b>                        | 0   | 8             | 5              |
|                                  | 1   | 1             | 5              |
| <b>Venous vessel invasion</b>    |     |               |                |
| <b>pV</b>                        | 0   | 9             | 10             |
|                                  | 1   | 0             | 0              |
| <b>Distant metastases</b>        |     |               |                |
| <b>M</b>                         | 0   | 9             | 10             |
|                                  | 1   | 0             | 0              |
| <b>Grading</b>                   |     |               |                |

|                       |                   |   |    |
|-----------------------|-------------------|---|----|
| <b>G</b>              | Low grade (1, 2)  | 8 | 8  |
|                       | High grade (3, 4) | 1 | 2  |
| <b>Residual tumor</b> |                   |   |    |
| <b>R</b>              | R0                | 9 | 10 |
|                       | R1                | 0 | 0  |
|                       | R2                | 0 | 0  |
| <b>UICC stage</b>     |                   |   |    |
|                       | IIA               | 8 | 0  |
|                       | IIB               | 1 | 0  |
|                       | IIC               | 0 | 0  |
|                       | IIIA              | 0 | 4  |
|                       | IIIB              | 0 | 6  |
|                       | IIIC              | 0 | 0  |
| <b>Tumor side</b>     |                   |   |    |
|                       | Coecum            | 0 | 1  |
|                       | Sigmoid colon     | 4 | 5  |
|                       | Rectum            | 5 | 4  |

---

Supplemental Table 2: Genome-scale analysis of protein expression analysis in 19 individually dissected colorectal carcinomas. Proteins identified at 1% FDR at both, peptide and protein level are counted.

| <b>Metrics</b>                                           | <b>Stage UICC III tumors</b> | <b>Stage UICC II tumors</b> |
|----------------------------------------------------------|------------------------------|-----------------------------|
| Average total number of MS/MS spectra assigned per tumor | 212,321 ± 39,634             | 220,754 ± 49,283            |
| Average total Number of proteins identified per tumor    | 5,040 ± 577                  | 5,167±1,034                 |
| Total number of proteins for all tumors in the group     | 8,346                        | 8,543                       |

Supplemental Table 3: Patient and tumor characteristics of lymph node negative (stage UICC II) and lymph node positive (stage UICC III) colon carcinomas of the validation cohort for immunohistochemistry.

|                                  | UICC II          | UICC III         |
|----------------------------------|------------------|------------------|
|                                  | mean             | mean             |
| n                                | 20               | 20               |
| Male                             | 11               | 12               |
| Female                           | 9                | 8                |
| Age                              | 66 (range 52-88) | 66 (range 51-80) |
| <b>Local tumor invasion</b>      |                  |                  |
| T1                               | 0                | 0                |
| T2                               | 0                | 5                |
| T3                               | 17               | 14               |
| T4                               | 3                | 1                |
| <b>Nodal status</b>              |                  |                  |
| N0                               | 20               | 0                |
| N1                               | 0                | 14               |
| N2                               | 0                | 6                |
| <b>Lymphatic vessel invasion</b> |                  |                  |
| L0                               | 16               | 12               |
| L1                               | 4                | 8                |
| <b>Venous vessel invasion</b>    |                  |                  |
| V0                               | 18               | 20               |
| V1                               | 2                | 0                |
| <b>Distant metastasis</b>        |                  |                  |
| M0                               | 20               | 20               |
| M1                               | 0                | 0                |
| <b>Grading</b>                   |                  |                  |
| Low grade                        | 16               | 13               |
| High grade                       | 4                | 7                |

**Supplemental Figure 2.** Scatter plots comparing spectral count data for about 6,400 proteins and the microarray data for the corresponding genes in 6 colorectal tumors. The Spearman correlation coefficients are indicated in the plots.

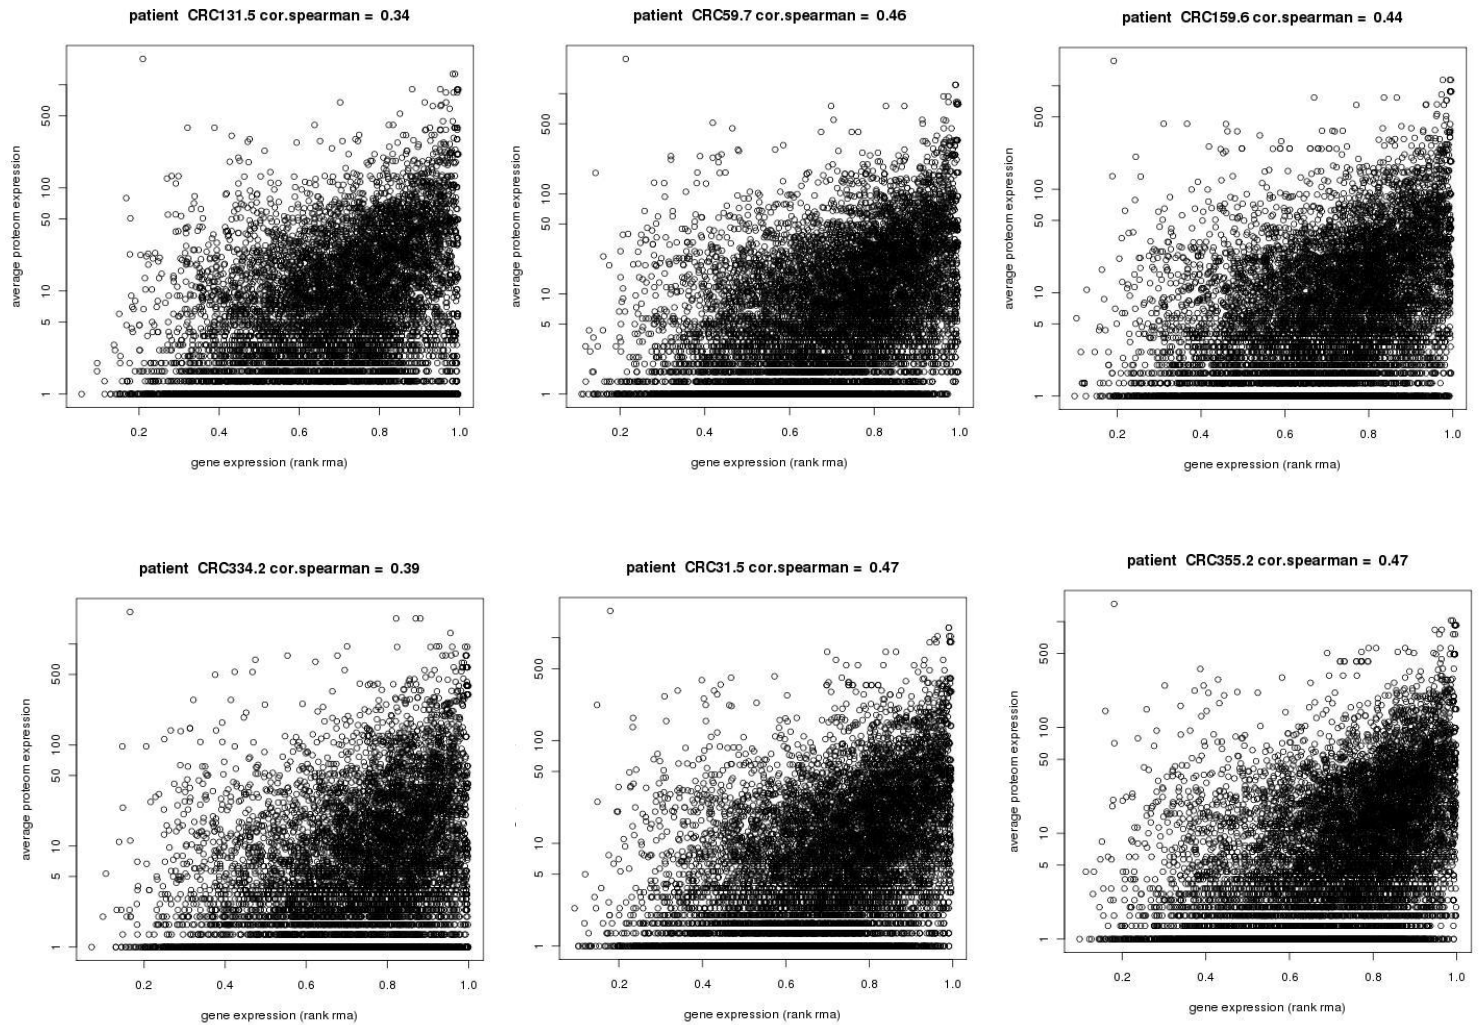

Mean  $r = 0.43 \pm 0.05$
